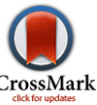

## Correction

# Correction: The Wnt Receptor Ryk Reduces Neuronal and Cell Survival Capacity by Repressing FOXO Activity During the Early Phases of Mutant Huntingtin Pathogenicity

## The *PLOS Biology* Staff

The eleventh author's name is spelled incorrectly. The correct name is: Jung Mook Lyu.

## Reference

1. Tourette C, Farina F, Vazquez-Manrique RP, Orfila A-M, Voisin J, et al. (2014) The Wnt Receptor Ryk Reduces Neuronal and Cell Survival Capacity by Repressing FOXO Activity During the Early Phases of Mutant Huntingtin Pathogenicity. *PLoS Biol* 12(6): e1001895. doi:10.1371/journal.pbio.1001895

---

**Citation:** The *PLOS Biology* Staff (2014) Correction: The Wnt Receptor Ryk Reduces Neuronal and Cell Survival Capacity by Repressing FOXO Activity During the Early Phases of Mutant Huntingtin Pathogenicity. *PLoS Biol* 12(7): e1001925. doi:10.1371/journal.pbio.1001925

**Published:** July 15, 2014

**Copyright:** © 2014 The *PLOS Biology* Staff. This is an open-access article distributed under the terms of the Creative Commons Attribution License, which permits unrestricted use, distribution, and reproduction in any medium, provided the original author and source are credited.
